# Supplementary material for: The Odyssey of the Ancestral Escherich Strain through Culture Collections: an Example of Allopatric Diversification
Source: PubMed Central journal article supplement (PMC5793043; doi:10.1128/msphere.00553-17), 2018-01-31
Supplement: sph001182464st1.pdf [file sph001182464st1.pdf]

TABLE S1. Plasmidic genes found in ATCC4157 and DSM301 ancestral Escherich strain isolates with MicroScope platform annotation

| Gene label ATCC4157* | Gene label DSM301* | Type | Gene_name | Product                                                                                                 |
|----------------------|--------------------|------|-----------|---------------------------------------------------------------------------------------------------------|
| AT4157R_v1_490011    | DSM301R_v1_600021  | CDS  |           | protein of unknown function                                                                             |
| AT4157R_v1_490074    | DSM301R_v1_1390004 | CDS  |           | ProQ/FINO family protein (fragment)                                                                     |
| AT4157R_v1_490048    | DSM301R_v1_1390030 | CDS  |           | conserved protein of unknown function                                                                   |
| AT4157R_v1_2030001   | DSM301R_v1_600001  | CDS  |           | conserved protein of unknown function                                                                   |
| AT4157R_v1_970025    | DSM301R_v1_350002  | CDS  |           | conserved protein of unknown function                                                                   |
| AT4157R_v1_490027    | DSM301R_v1_600005  | CDS  |           | conserved protein of unknown function                                                                   |
| AT4157R_v1_970009    | DSM301R_v1_820009  | fcDS | ydfJ      | fragment of putative transporter (part 2)                                                               |
| AT4157R_v1_490075    | DSM301R_v1_1390003 | CDS  |           | conserved protein of unknown function                                                                   |
| AT4157R_v1_310006    | DSM301R_v1_180008  | CDS  |           | conserved protein of unknown function                                                                   |
| AT4157R_v1_490014    | DSM301R_v1_600018  | CDS  | ccdA      | Antitoxin CcdA                                                                                          |
| AT4157R_v1_490022    | DSM301R_v1_600010  | CDS  |           | conserved protein of unknown function                                                                   |
| AT4157R_v1_490047    | DSM301R_v1_1390031 | CDS  | traR      | Protein TraR                                                                                            |
| AT4157R_v1_970017    | DSM301R_v1_820017  | CDS  |           | conserved protein of unknown function                                                                   |
| AT4157R_v1_970043    | DSM301R_v1_350020  | CDS  |           | conserved protein of unknown function                                                                   |
| AT4157R_v1_490038    | DSM301R_v1_1390040 | CDS  | traY      | Relaxosome protein TraY                                                                                 |
| AT4157R_v1_2030004   | DSM301R_v1_600004  | CDS  |           | conserved protein of unknown function                                                                   |
| AT4157R_v1_490004    | DSM301R_v1_600024  | CDS  | vagC      | Virulence-associated protein VagC                                                                       |
| AT4157R_v1_490007    | DSM301R_v1_600027  | CDS  |           | Virulence-associated protein VagC                                                                       |
| AT4157R_v1_490029    | DSM301R_v1_1390049 | CDS  | ykfF      | hypothetical protein; CP4-6 prophage                                                                    |
| AT4157R_v1_970035    | DSM301R_v1_350012  | CDS  |           | conserved protein of unknown function                                                                   |
| AT4157R_v1_970044    | DSM301R_v1_350021  | CDS  |           | Protein impB (fragment)                                                                                 |
| AT4157R_v1_490076    | DSM301R_v1_1390002 | CDS  | repA2     | Replication regulatory protein repA2                                                                    |
| AT4157R_v1_490056    | DSM301R_v1_1390022 | CDS  | trbE      | Protein TrbE                                                                                            |
| AT4157R_v1_970001    | DSM301R_v1_820001  | CDS  |           | conserved protein of unknown function                                                                   |
| AT4157R_v1_970037    | DSM301R_v1_350014  | CDS  |           | conserved protein of unknown function                                                                   |
| AT4157R_v1_970002    | DSM301R_v1_820002  | CDS  |           | YacB                                                                                                    |
| AT4157R_v1_490059    | DSM301R_v1_1390019 | CDS  | traQ      | Protein TraQ                                                                                            |
| AT4157R_v1_970036    | DSM301R_v1_350013  | CDS  |           | conserved protein of unknown function                                                                   |
| AT4157R_v1_490033    | DSM301R_v1_1390045 | CDS  |           | conserved protein of unknown function                                                                   |
| AT4157R_v1_490061    | DSM301R_v1_1390017 | CDS  | trbJ      | Protein TrbJ                                                                                            |
| AT4157R_v1_970026    | DSM301R_v1_350003  | CDS  |           | transposase                                                                                             |
| AT4157R_v1_970038    | DSM301R_v1_350015  | CDS  |           | Uncharacterized 11.1 kDa protein                                                                        |
| AT4157R_v1_490070    | DSM301R_v1_1390008 | CDS  |           | TrwC relaxase family protein                                                                            |
| AT4157R_v1_490015    | DSM301R_v1_1390025 | CDS  | ccdB      | Toxin CcdB                                                                                              |
| AT4157R_v1_490053    | DSM301R_v1_600017  | CDS  |           | conserved protein of unknown function                                                                   |
| AT4157R_v1_490040    | DSM301R_v1_1390038 | CDS  | traL      | Protein TraL                                                                                            |
| AT4157R_v1_490058    | DSM301R_v1_1390020 | CDS  | trbA      | Protein TrbA                                                                                            |
| AT4157R_v1_490045    | DSM301R_v1_1390033 | CDS  |           | Conjugal transfer protein TrbD                                                                          |
| AT4157R_v1_490039    | DSM301R_v1_1390039 | CDS  | traA      | Pilin                                                                                                   |
| AT4157R_v1_310007    | DSM301R_v1_180007  | CDS  | crcB      | conserved hypothetical protein; putative inner membrane protein associated with chromosome condensation |
| AT4157R_v1_970032    | DSM301R_v1_350009  | CDS  |           | RutC family protein in vnfA 5' region                                                                   |
| AT4157R_v1_490036    | DSM301R_v1_1390042 | CDS  | traM      | Relaxosome protein TraM                                                                                 |
| AT4157R_v1_490050    | DSM301R_v1_1390028 | CDS  | trbI      | Protein TrbI                                                                                            |
| AT4157R_v1_490062    | DSM301R_v1_1390016 | CDS  |           | Conjugal transfer protein TrbF                                                                          |
| AT4157R_v1_490003    | DSM301R_v1_600025  | CDS  | vapC      | tRNA(fMet)-specific endonuclease VapC                                                                   |
| AT4157R_v1_490006    | DSM301R_v1_600028  | CDS  | vapC      | tRNA(fMet)-specific endonuclease VapC                                                                   |
| AT4157R_v1_490026    | DSM301R_v1_600006  | CDS  |           | conserved protein of unknown function                                                                   |
| AT4157R_v1_490025    | DSM301R_v1_600007  | CDS  | yubI      | putative antirestriction protein YubI                                                                   |
| AT4157R_v1_310005    | DSM301R_v1_180009  | CDS  |           | conserved protein of unknown function                                                                   |
| AT4157R_v1_490023    | DSM301R_v1_600009  | CDS  |           | conserved protein of unknown function                                                                   |
| AT4157R_v1_490031    | DSM301R_v1_1390047 | CDS  | psiB      | Protein PsiB                                                                                            |
| AT4157R_v1_490073    | DSM301R_v1_1390005 | CDS  |           | Fertility inhibition protein (fragment)                                                                 |
| AT4157R_v1_490066    | DSM301R_v1_1390012 | CDS  | traS      | TraS protein                                                                                            |
| AT4157R_v1_970004    | DSM301R_v1_820004  | CDS  |           | conserved protein of unknown function                                                                   |
| AT4157R_v1_490009    | DSM301R_v1_600023  | CDS  |           | conserved protein of unknown function                                                                   |
| AT4157R_v1_490035    | DSM301R_v1_1390043 | CDS  | X         | X polypeptide                                                                                           |
| AT4157R_v1_490013    | DSM301R_v1_600019  | CDS  |           | conserved protein of unknown function                                                                   |
| AT4157R_v1_490046    | DSM301R_v1_1390032 | CDS  | traV      | Protein TraV                                                                                            |
| AT4157R_v1_490063    | DSM301R_v1_1390015 | CDS  |           | Protein TraH (fragment)                                                                                 |
| AT4157R_v1_490028    | DSM301R_v1_1390050 | CDS  | ssb       | Single-stranded DNA-binding protein                                                                     |
| AT4157R_v1_490060    | DSM301R_v1_1390018 | CDS  | trbB      | Protein TrbB                                                                                            |
| AT4157R_v1_2030002   | DSM301R_v1_600002  | CDS  |           | conserved protein of unknown function                                                                   |
| AT4157R_v1_490041    | DSM301R_v1_1390037 | CDS  | traE      | Protein TraE                                                                                            |
| AT4157R_v1_490044    | DSM301R_v1_1390034 | CDS  | traP      | Protein TraP                                                                                            |
| AT4157R_v1_490068    | DSM301R_v1_1390010 | CDS  |           | conserved protein of unknown function                                                                   |
| AT4157R_v1_490051    | DSM301R_v1_1390027 | CDS  | traW      | Protein TraW                                                                                            |
| AT4157R_v1_490054    | DSM301R_v1_1390024 | CDS  | trbC      | Periplasmic protein TrbC                                                                                |
| AT4157R_v1_490037    | DSM301R_v1_1390041 | CDS  | traJ      | Protein TraJ                                                                                            |
| AT4157R_v1_490021    | DSM301R_v1_600011  | CDS  | yubD      | putative methylase YubD                                                                                 |
| AT4157R_v1_970006    | DSM301R_v1_820006  | CDS  |           | conserved membrane protein of unknown function                                                          |
| AT4157R_v1_490032    | DSM301R_v1_1390046 | CDS  | psiA      | Protein PsiA                                                                                            |
| AT4157R_v1_490042    | DSM301R_v1_1390036 | CDS  | traK      | TraK lipoprotein                                                                                        |
| AT4157R_v1_490067    | DSM301R_v1_1390011 | CDS  | traT      | TraT complement resistance protein                                                                      |
| AT4157R_v1_490064    | DSM301R_v1_1390014 | CDS  |           | Protein TraH (fragment)                                                                                 |
| AT4157R_v1_970041    | DSM301R_v1_350018  | CDS  | intM      | putative site-specific recombinase                                                                      |
| AT4157R_v1_490057    | DSM301R_v1_1390021 | CDS  | traF      | Protein TraF                                                                                            |
| AT4157R_v1_490072    | DSM301R_v1_1390006 | CDS  | traX      | Protein TraX                                                                                            |
| AT4157R_v1_970034    | DSM301R_v1_350011  | CDS  | rhmR      | Uncharacterized HTH-type transcriptional regulator RhmR                                                 |
| AT4157R_v1_490017    | DSM301R_v1_600015  | CDS  | repE      | Replication initiation protein, FIA                                                                     |
| AT4157R_v1_490010    | DSM301R_v1_600022  | CDS  |           | K88 minor fimbrial subunit faeH                                                                         |
| AT4157R_v1_490016    | DSM301R_v1_600016  | CDS  | resD      | Resolvase                                                                                               |
| AT4157R_v1_490034    | DSM301R_v1_1390044 | CDS  | yafZ      | conserved hypothetical protein; CP4-6 prophage                                                          |
| AT4157R_v1_970029    | DSM301R_v1_350006  | CDS  | cpdA      | 3',5'-cyclic adenosine monophosphate phosphodiesterase CpdA                                             |
| AT4157R_v1_310002    | DSM301R_v1_180012  | CDS  | yfeB      | Chelated iron transport system membrane protein YfeB                                                    |
| AT4157R_v1_490024    | DSM301R_v1_600008  | CDS  |           | conserved protein of unknown function                                                                   |
| AT4157R_v1_970003    | DSM301R_v1_820003  | CDS  | yacC      | putative exoribonuclease YacC                                                                           |
| AT4157R_v1_310003    | DSM301R_v1_1390001 | CDS  | yfeC      | Chelated iron transport system membrane protein YfeC                                                    |
| AT4157R_v1_310004    | DSM301R_v1_180010  | CDS  | yfeD      | Chelated iron transport system membrane protein YfeD                                                    |
| AT4157R_v1_490077    | DSM301R_v1_180011  | CDS  | repA1     | Replication initiation protein                                                                          |
| AT4157R_v1_970031    | DSM301R_v1_350008  | CDS  |           | conserved membrane protein of unknown function                                                          |
| AT4157R_v1_970030    | DSM301R_v1_350007  | CDS  |           | conserved membrane protein of unknown function                                                          |
| AT4157R_v1_310001    | DSM301R_v1_180013  | CDS  | hpf       | putative metal ABC transporter substrate-binding protein Hpf                                            |
| AT4157R_v1_490020    | DSM301R_v1_600012  | CDS  |           | conserved protein of unknown function                                                                   |
| AT4157R_v1_310010    | DSM301R_v1_180004  | CDS  | iucB      | N(6)-hydroxylysine O-acetyltransferase                                                                  |

|                    |                    |      |      |                                                                                         |
|--------------------|--------------------|------|------|-----------------------------------------------------------------------------------------|
| AT4157R_v1_970033  | DSM301R_v1_350010  | CDS  | kdgT | 2-keto-3-deoxy-D-gluconate transporter                                                  |
| AT4157R_v1_490019  | DSM301R_v1_600013  | CDS  | sopB | Protein SopB                                                                            |
| AT4157R_v1_970042  | DSM301R_v1_350019  | CDS  | repA | RepFIB replication protein A                                                            |
| AT4157R_v1_490052  | DSM301R_v1_1390026 | CDS  | traU | Protein TraU                                                                            |
| AT4157R_v1_490001  | DSM301R_v1_600030  | CDS  |      | Helicase UvrD                                                                           |
| AT4157R_v1_970005  | DSM301R_v1_820005  | CDS  |      | transposase                                                                             |
| AT4157R_v1_970008  | DSM301R_v1_820008  | CDS  |      | Transcriptional regulator CKO_02662, LacI family                                        |
| AT4157R_v1_970007  | DSM301R_v1_820007  | CDS  |      | Inosine-uridine preferring nucleoside hydrolase                                         |
| AT4157R_v1_970028  | DSM301R_v1_350005  | CDS  | ugpC | sn-glycerol-3-phosphate import ATP-binding protein UgpC                                 |
| AT4157R_v1_490012  | DSM301R_v1_600020  | CDS  |      | conserved protein of unknown function                                                   |
| AT4157R_v1_970010  | DSM301R_v1_820010  | fCDS | ydfJ | fragment of putative transporter (part 1)                                               |
| AT4157R_v1_490018  | DSM301R_v1_600014  | CDS  | sopA | Protein SopA                                                                            |
| AT4157R_v1_970039  | DSM301R_v1_350016  | CDS  |      | conserved membrane protein of unknown function                                          |
| AT4157R_v1_970020  | DSM301R_v1_820020  | CDS  |      | putative Aspartate transaminase                                                         |
| AT4157R_v1_310008  | DSM301R_v1_180006  | CDS  | shif | Transport protein ShiF                                                                  |
| AT4157R_v1_310012  | DSM301R_v1_180002  | CDS  | iucD | L-lysine N6-monooxygenase                                                               |
| AT4157R_v1_970027  | DSM301R_v1_350004  | CDS  |      | Glycerol-3-phosphate-binding protein                                                    |
| AT4157R_v1_2030003 | DSM301R_v1_600003  | CDS  |      | conserved protein of unknown function                                                   |
| AT4157R_v1_490043  | DSM301R_v1_1390035 | CDS  | traB | Protein TraB                                                                            |
| AT4157R_v1_970019  | DSM301R_v1_820019  | CDS  |      | Uncharacterized Na <sup>(+)</sup> /H <sup>(+)</sup> antiporter HI_1107                  |
| AT4157R_v1_490002  | DSM301R_v1_600029  | CDS  |      | conserved protein of unknown function                                                   |
| AT4157R_v1_310009  | DSM301R_v1_180005  | CDS  | iucA | N(2)-citryl-N(6)-acetyl-N(6)-hydroxylysine synthase                                     |
| AT4157R_v1_310011  | DSM301R_v1_180003  | CDS  | iucC | Aerobactin synthase                                                                     |
| AT4157R_v1_490055  | DSM301R_v1_1390023 | CDS  | traN | Protein TraN                                                                            |
| AT4157R_v1_490030  | DSM301R_v1_1390048 | CDS  |      | conserved protein of unknown function                                                   |
| AT4157R_v1_310013  | DSM301R_v1_180001  | CDS  | iutA | Ferric aerobactin receptor                                                              |
| AT4157R_v1_490069  | DSM301R_v1_1390009 | CDS  | traD | Coupling protein TraD                                                                   |
| AT4157R_v1_490049  | DSM301R_v1_1390029 | CDS  | traC | Protein TraC                                                                            |
| AT4157R_v1_490065  | DSM301R_v1_1390013 | CDS  | traG | Protein TraG                                                                            |
| AT4157R_v1_490005  | DSM301R_v1_600026  | CDS  |      | conserved protein of unknown function                                                   |
| AT4157R_v1_490071  | DSM301R_v1_1390007 | CDS  | tral | Multifunctional conjugation protein Tral [Includes: DNA relaxase Tral ; DNA helicase I] |

\*Genes can be retrieved on MicroScope platform using their labels
