# Supplementary material for: The Odyssey of the Ancestral Escherich Strain through Culture Collections: an Example of Allopatric Diversification
Source: PubMed Central journal article supplement (PMC5793043; doi:10.1128/msphere.00553-17), 2018-01-31
Supplement: sph001182464st2.pdf [file sph001182464st2.pdf]

TABLE S2. Clusters of Orthologous Groups (COG) distribution in the NCTC86\_Dunne and in genes affected by mutation in the other ancestral Escherich strain isolates

| COG Classes                                                   | NCTC86_Dunne | NCTC86_Meric | NCTC86 | CIP61.11 | ATCC4157 | DSM301 |
|---------------------------------------------------------------|--------------|--------------|--------|----------|----------|--------|
|                                                               | Count        | Count        | Count  | Count    | Count    | Count  |
| Amino acid transport and metabolism                           | 459          | 1            | 3      | 15       | 58       | 67     |
| Carbohydrate transport and metabolism                         | 464          | 3            | 7      | 14       | 76       | 85     |
| Cell cycle control, cell division, chromosome partitioning    | 41           | 0            | 0      | 6        | 9        | 12     |
| Cell motility                                                 | 118          | 1            | 1      | 8        | 17       | 20     |
| Cell wall/membrane/envelope biogenesis                        | 271          | 2            | 2      | 13       | 39       | 38     |
| Coenzyme transport and metabolism                             | 153          | 1            | 1      | 5        | 20       | 24     |
| Defense mechanisms                                            | 56           | 0            | 0      | 3        | 8        | 9      |
| Energy production and conversion                              | 323          | 4            | 6      | 12       | 47       | 47     |
| Extracellular structures                                      | 4            | 0            | 1      | 0        | 1        | 1      |
| Function unknown                                              | 347          | 1            | 0      | 8        | 31       | 36     |
| General function prediction only                              | 550          | 6            | 10     | 17       | 75       | 85     |
| Inorganic ion transport and metabolism                        | 297          | 1            | 4      | 11       | 40       | 44     |
| Intracellular trafficking, secretion, and vesicular transport | 162          | 1            | 3      | 8        | 24       | 27     |
| Lipid transport and metabolism                                | 107          | 1            | 1      | 4        | 20       | 24     |
| Nucleotide transport and metabolism                           | 96           | 1            | 2      | 7        | 18       | 20     |
| Posttranslational modification, protein turnover, chaperones  | 149          | 0            | 0      | 2        | 23       | 23     |
| Replication, recombination and repair                         | 349          | 3            | 4      | 15       | 38       | 44     |
| RNA processing and modification                               | 3            | 0            | 0      | 2        | 2        | 2      |
| Secondary metabolites biosynthesis, transport and catabolism  | 92           | 1            | 1      | 2        | 12       | 17     |
| Signal transduction mechanisms                                | 220          | 0            | 0      | 11       | 45       | 61     |
| Transcription                                                 | 357          | 5            | 7      | 18       | 60       | 65     |
| Translation, ribosomal structure and biogenesis               | 183          | 2            | 2      | 7        | 18       | 21     |
