# Supplementary material for: The Odyssey of the Ancestral Escherich Strain through Culture Collections: an Example of Allopatric Diversification
Source: PubMed Central journal article supplement (PMC5793043; doi:10.1128/msphere.00553-17), 2018-01-31
Supplement: sph001182464st3.pdf [file sph001182464st3.pdf]

TABLE S3. Mutations found in mutator genes in ancestral Escherich strain isolates and prediction of their functional effect

| Genes              | Gene products                         | Mutations at the protein level*  |                                  |                                  |                                  |                                  | Predictions of functional effect      |                           |                      | Frequency of the observed allele in Uniprot |
|--------------------|---------------------------------------|----------------------------------|----------------------------------|----------------------------------|----------------------------------|----------------------------------|---------------------------------------|---------------------------|----------------------|---------------------------------------------|
|                    |                                       | NCTC86_Meric                     | NCTC86                           | CIP61.11                         | ATCC4157                         | DSM301                           | SIFT                                  | PolyPhen-2                | PROVEAN              |                                             |
| <i>dnaQ (mutD)</i> | ε subunit of DNA polymerase III       | -                                | -                                | -                                | -                                | -                                |                                       |                           |                      |                                             |
| <i>polC (dnaE)</i> | α subunit of DNA polymerase III       | -                                | -                                | -                                | -                                | -                                |                                       |                           |                      |                                             |
| <i>polA</i>        | DNA polymerase I                      | -                                | -                                | -                                | -                                | -                                |                                       |                           |                      |                                             |
| <i>mutT</i>        | Nucleoside triphosphatase             | Frameshift (truncated)           | Frameshift (truncated)           | Frameshift (truncated)           | Frameshift (truncated)           | Frameshift (truncated)           |                                       |                           |                      |                                             |
| <i>dam</i>         | DNA adenine methyltransferase         | P141T                            | P141T                            | P141T                            | P141T                            | P141T                            | 0.08                                  | Probably damaging (0.990) | Deleterious (-7.836) | 0/106                                       |
| <i>mutS</i>        | DNA mismatch repair protein MutS      | V785I                            | V785I                            | V785I                            | V785I                            | V785I                            | 0.02                                  | Possibly damaging (0.790) | Neutral (-0.818)     | 0/233                                       |
| <i>mutL</i>        | DNA mismatch repair protein MutL      | 68delL<br>69delA                 | 68delL<br>69delA                 | 68delL<br>69delA                 | 68delL<br>69delA                 | 68delL<br>69delA                 |                                       |                           |                      |                                             |
| <i>mutH</i>        | Endonuclease                          | -                                | -                                | -                                | -                                | -                                |                                       |                           |                      |                                             |
| <i>uvrD</i>        | DNA helicase II                       | E152V                            | E152V                            | E152V                            | E152V                            | E152V                            | 0.00                                  | Benign (0.167)            | Deleterious (-5.393) | 0/132                                       |
| <i>mutY</i>        | DNA glycosylase                       | A217S<br>A280S                   | A217S<br>A280S                   | A217S<br>A280S                   | A217S<br>A280S                   | A217S<br>A280S                   | 0.70<br>0.80                          | Benign (0.000)            | Neutral (-0.028)     | 72/104                                      |
| <i>mutM</i>        | DNA glycosylase                       | S98N<br>T127A                    | S98N<br>T127A                    | S98N<br>T127A                    | S98N<br>T127A                    | S98N<br>T127A                    | 0.67<br>1.00                          | Benign (0.000)            | Neutral (-0.459)     | 19/217                                      |
| <i>miaA</i>        | Transferase                           | -                                | -                                | -                                | N163H                            | N163H                            | 0.08                                  | Probably damaging (1.000) | Deleterious (-4.47)  | 0/216                                       |
| <i>sodA</i>        | Superoxide dismutases                 | -                                | -                                | -                                | -                                | -                                |                                       |                           |                      |                                             |
| <i>sodB</i>        | Superoxide dismutases                 | -                                | -                                | -                                | V71A                             | V71A                             | 0.46                                  | Possibly damaging (0.899) | Deleterious (-3.522) | 0/71                                        |
| <i>oxyR</i>        | Regulatory protein                    | -                                | -                                | -                                | -                                | -                                |                                       |                           |                      |                                             |
| <i>nth</i>         | Glycosylase and abasic-lyase activity | -                                | -                                | -                                | -                                | -                                |                                       |                           |                      |                                             |
| <i>nei</i>         | Glycosylase and abasic-lyase activity | -                                | -                                | -                                | -                                | -                                |                                       |                           |                      |                                             |
| <i>xthA</i>        | Nuclease                              | -                                | -                                | -                                | -                                | -                                |                                       |                           |                      |                                             |
| <i>nfo</i>         | Nuclease                              | -                                | -                                | -                                | -                                | -                                |                                       |                           |                      |                                             |
| <i>ung</i>         | Uracil glycosylase                    | -                                | -                                | -                                | -                                | -                                |                                       |                           |                      |                                             |
| <i>vsr</i>         | Endonuclease                          | A2V<br>S45D<br>E128A             | A2V<br>S45D<br>E128A             | A2V<br>S45D<br>E128A             | A2V<br>S45D<br>E128A             | A2V<br>S45D<br>E128A             | 0.26<br>0.75<br>0.00 (low confidence) | Possibly damaging (0.562) | Neutral (-1.537)     | 17/95                                       |
| <i>ada</i>         | Methyltransferase                     | -                                | -                                | -                                | -                                | -                                |                                       |                           |                      |                                             |
| <i>ogt</i>         | Methyltransferase                     | -                                | -                                | -                                | -                                | -                                |                                       |                           |                      |                                             |
| <i>recA</i>        | DNA-binding protein                   | -                                | -                                | -                                | -                                | -                                |                                       |                           |                      |                                             |
|                    |                                       | A8T                              | A8T                              | A8T                              | A8T                              | A8T                              | 0.00 (low confidence)                 | Benign (0.000)            | Neutral (-0.127)     | 19/247                                      |
|                    |                                       | A109T                            | A109T                            | A109T                            | A109T                            | A109T                            | 0.33                                  | Benign (0.000)            | Neutral (-0.645)     | 210/247                                     |
| <i>recG</i>        | DNA helicase                          | R282H<br>E347K<br>A362S<br>H476R | R282H<br>E347K<br>A362S<br>H476R | R282H<br>E347K<br>A362S<br>H476R | R282H<br>E347K<br>A362S<br>H476R | R282H<br>E347K<br>A362S<br>H476R | 0.07<br>0.75<br>0.31<br>0.54          | Benign (0.000)            | Neutral (-0.027)     | 36/247                                      |
| <i>hns</i>         | DNA-binding protein                   | -                                | -                                | -                                | -                                | -                                |                                       |                           |                      |                                             |
| <i>topB (mutR)</i> | DNA topoisomerase III                 | -                                | -                                | L474V                            | -                                | -                                | 0.54                                  | Benign (0.000)            | Neutral (-0.392)     | 1/254                                       |
| <i>ssb</i>         | Single-stranded DNA-binding protein   | -                                | -                                | -                                | -                                | -                                |                                       |                           |                      |                                             |

\*Mutations predicted to be deleterious at the protein level at least with two of the three softwares and absent in Uniprot database are highlighted in red
