# Supplementary material for: The Odyssey of the Ancestral Escherich Strain through Culture Collections: an Example of Allopatric Diversification
Source: PubMed Central journal article supplement (PMC5793043; doi:10.1128/msphere.00553-17), 2018-01-31
Supplement: sph001182464st4.pdf [file sph001182464st4.pdf]

TABLE S4. Minimum Inhibitory Concentration (mg/L) values of antibiotics for the ancestral *Escherich* strain isolates

| Antibiotics                   | NCTC86                  | CIP61.11                | ATCC4157                 | DSM301                   | Breakpoints*    | HS(<=1%) <sup>‡</sup> | VS(<=5%) <sup>‡</sup> |
|-------------------------------|-------------------------|-------------------------|--------------------------|--------------------------|-----------------|-----------------------|-----------------------|
| benzylpenicillin              | 2 (sq) <sup>§</sup>     | 1.5 (sq) <sup>§</sup>   | 0.5 (sq) <sup>§</sup>    | 0.25 (sq) <sup>§</sup>   | NC <sup>§</sup> | -                     | -                     |
| amoxicillin                   | 1                       | 0.5                     | 0.75                     | 0.75                     | 8               | 0.5                   | 1                     |
| ampicillin                    | 0.5                     | 0.5                     | 0.19 (sq) <sup>§</sup>   | 0.19                     | 8               | 0.5                   | ND <sup>‡</sup>       |
| piperacillin                  | 0.125 (sq) <sup>§</sup> | 0.064                   | 0.064                    | 0.064 (sq) <sup>§</sup>  | 8               | 0.25                  | 0.5                   |
| amoxicillin / clavulanic acid | 1                       | 0.5                     | 0.75                     | 0.75                     | 8               | ND <sup>‡</sup>       | ND <sup>‡</sup>       |
| ticarcillin / clavulanic acid | 0.5                     | 0.38                    | 0.38                     | 0.38                     | 8               | 0.5                   | ND <sup>‡</sup>       |
| cefalotin                     | 1 (sq) <sup>§</sup>     | 0.75                    | 2 (sq) <sup>§</sup>      | 1 (sq) <sup>§</sup>      | 32 <sup>‡</sup> | 1                     | 2                     |
| cefoxitin                     | 1 (sq) <sup>§</sup>     | 0.75                    | 0.75                     | 0.75                     | 8               | 0.5                   | ND <sup>‡</sup>       |
| cefixim                       | 0.032 (sq) <sup>§</sup> | <0.016                  | <0.016 (sq) <sup>§</sup> | <0.016 (sq) <sup>§</sup> | 1               | 0.032                 | ND <sup>‡</sup>       |
| cefotaxim                     | 0.006                   | <0.002                  | <0.002 (sq) <sup>§</sup> | <0.002                   | 1               | 0.008                 | 0.016                 |
| ceftazidim                    | 0.023                   | 0.032                   | 0.023                    | 0.023                    | 1               | 0.016                 | 0.032                 |
| aztreonam                     | <0.016                  | <0.016                  | <0.016                   | <0.016                   | 1               | 0.016                 | ND <sup>‡</sup>       |
| cefepim                       | <0.016                  | <0.016                  | <0.016                   | <0.016                   | 1               | ND <sup>‡</sup>       | 0.008                 |
| ceftriaxone                   | 0.002 (sq) <sup>§</sup> | 0.002                   | <0.002 (sq) <sup>§</sup> | <0.002 (sq) <sup>§</sup> | 1               | ND <sup>‡</sup>       | 0.008                 |
| ertapenem                     | 0.004                   | 0.003                   | 0.006                    | 0.004                    | 0.5             | ND <sup>‡</sup>       | ND <sup>‡</sup>       |
| imipenem                      | 0.094                   | 0.094                   | 0.19                     | 0.125                    | 2               | 0.016                 | 0.032                 |
| chloramphenicol               | 0.5                     | <0.38                   | 0.5                      | 0.5                      | 8               | 1                     | ND <sup>‡</sup>       |
| tetracyclin                   | 0.25                    | 0.125                   | 0.25                     | 0.25                     | 8 <sup>‡</sup>  | 0.25                  | 0.5                   |
| tigecyclin                    | 0.125                   | 0.25                    | 0.094                    | 0.125                    | 1               | 0.032                 | ND <sup>‡</sup>       |
| colistin                      | 0.094                   | 0.064                   | 0.094                    | 0.094                    | 2               | 0.064                 | 0.125                 |
| nalidixic acid                | 0.5                     | 0.25                    | 0.25                     | 0.25                     | 16              | 0.5                   | ND <sup>‡</sup>       |
| levofloxacin                  | 0.006 (sq) <sup>§</sup> | 0.002 (sq) <sup>§</sup> | 0.006 (sq) <sup>§</sup>  | 0.003 (sq) <sup>§</sup>  | 0.5             | 0.008                 | 0.016                 |
| ofloxacin                     | 0.008 (sq) <sup>§</sup> | 0.008 (sq) <sup>§</sup> | 0.008 (sq) <sup>§</sup>  | 0.006 (sq) <sup>§</sup>  | 0.25            | 0.016                 | ND <sup>‡</sup>       |
| ciprofloxacin                 | <0.002                  | <0.002                  | <0.002                   | <0.002                   | 0.25            | 0.002                 | 0.004                 |
| norfloxacin                   | <0.016                  | <0.016                  | 0.016                    | <0.016                   | 0.5             | 0.016                 | ND <sup>‡</sup>       |
| moxifloxacin                  | 0.008 (sq) <sup>§</sup> | 0.008                   | 0.004                    | 0.003 (sq) <sup>§</sup>  | 0.25            | 0.008                 | 0.016                 |
| kanamycin                     | 1                       | 1                       | 0.75                     | 1                        | 8 <sup>‡</sup>  | 0.125                 | 0.25                  |
| amikacin                      | 1                       | 1                       | 1                        | 1.5                      | 8               | 0.25                  | 0.5                   |
| streptomycin                  | 1.5                     | 1                       | 1                        | 1.5                      | 16 <sup>‡</sup> | 1                     | ND <sup>‡</sup>       |
| gentamicin                    | 0.125                   | 0.125                   | 0.125                    | 0.125                    | 2               | 0.125                 | ND <sup>‡</sup>       |
| tobramycin                    | 0.25                    | 0.19                    | 0.19                     | 0.25                     | 2               | 0.125                 | 0.25                  |
| trimethoprim                  | 0.016                   | 0.012                   | 0.032                    | 0.032                    | 2               | ND <sup>‡</sup>       | 0.064                 |
| cotrimoxazol                  | 0.008                   | 0.008                   | 0.012                    | 0.016                    | 2               | 0.016                 | ND <sup>‡</sup>       |
| erythromycin                  | 64                      | 256                     | 48                       | 32                       | NC <sup>§</sup> | -                     | -                     |
| azithromycin                  | 2                       | 8                       | 2                        | 2                        | 16              | 0.5                   | 1                     |
| fosfomycin                    | 0.19                    | 0.19                    | 0.5                      | 0.38                     | 32              | 0.064                 | 0.25                  |

\*Breakpoints are clinical breakpoints from the CASFM-EUCAST (V1.0 2017/03), or Epidemiological Cut-OFF (<sup>‡</sup>) from EUCAST if clinical breakpoint unavailable

<sup>‡</sup>Using the MIC distribution from EUCAST we defined hypersusceptible (HS) (green) and Very-susceptible (VS) (blue) cut-off as the lowest MIC encompassing 1 and 5% of the *E. coli* strains, respectively

<sup>§</sup>The presence of squatter colonies is mentioned by (sq)

<sup>§</sup>NC : no cut-off (clinical or epidemiological) provided by EUCAST

<sup>‡</sup>ND : not determined
