# Supplementary material for: The Odyssey of the Ancestral Escherich Strain through Culture Collections: an Example of Allopatric Diversification
Source: PubMed Central journal article supplement (PMC5793043; doi:10.1128/msphere.00553-17), 2018-01-31
Supplement: sph001182464st5.pdf [file sph001182464st5.pdf]

TABLE S5. Mutations and predictions of protein change on candidate genes to hypersusceptibility of the ancestral Escherich strain isolates

| Genes       | Gene products                                                      | Mutations at the protein level* |          |          |        | Predictions of functional effect |                           |                      | Frequency of the observed allele in Uniprot |
|-------------|--------------------------------------------------------------------|---------------------------------|----------|----------|--------|----------------------------------|---------------------------|----------------------|---------------------------------------------|
|             |                                                                    | NCTC86                          | CIP61.11 | ATCC4157 | DSM301 | SIFT <sup>‡</sup>                | PolyPhen-2 <sup>§</sup>   | PROVEAN <sup>§</sup> |                                             |
| <i>acrA</i> | Sub-unit of efflux pump AcrAB-ToIC                                 | -                               | -        | -        | -      |                                  |                           |                      |                                             |
| <i>acrB</i> | Sub-unit of efflux pump AcrAB-ToIC                                 | -                               | -        | K659N    | K659N  | 0.20                             | Benign (0.001)            | Deleterious (-2.666) | 1/79                                        |
|             |                                                                    | G679S                           | G679S    | G679S    | G679S  | 0.00                             | Probably damaging (0.998) | Deleterious (-5.837) | 0/79                                        |
| <i>tolC</i> | Sub-unit of multi druf efflux systems                              | -                               | -        | -        | -      |                                  |                           |                      |                                             |
| <i>acrD</i> | Sub-unit of efflux pump AcrAD-ToIC                                 | -                               | -        | -        | -      |                                  |                           |                      |                                             |
| <i>acrE</i> | Sub-unit of efflux pump AcrEF-ToIC                                 | G191D                           | G191D    | G191D    | G191D  | 0.00                             | Probably damaging (1.000) | Deleterious (-6.973) | 0/46                                        |
| <i>acrR</i> | DNA binding transcriptional repressor                              | -                               | -        | -        | -      |                                  |                           |                      |                                             |
| <i>acrZ</i> | AcrB transmembran domain associated protein                        | -                               | -        | -        | -      |                                  |                           |                      |                                             |
| <i>acrS</i> | Regulator/repressor of efflux pump AcrEF-ToIC                      | W50R                            | W50R     | W50R     | W50R   | 0.00                             | Probably damaging (0.957) | Deleterious (-13.78) | 0/42                                        |
| <i>marA</i> | DNA binding transcriptional activator                              | -                               | -        | -        | -      |                                  |                           |                      |                                             |
| <i>marB</i> | DNA binding transcriptional activator                              | -                               | -        | -        | -      |                                  |                           |                      |                                             |
| <i>marR</i> | DNA binding transcriptional repressor                              | -                               | -        | -        | -      |                                  |                           |                      |                                             |
| <i>soxS</i> | DNA binding transcriptional regulator                              | -                               | -        | -        | -      |                                  |                           |                      |                                             |
| <i>soxR</i> | DNA binding transcriptional dual regulator                         | -                               | -        | -        | -      |                                  |                           |                      |                                             |
| <i>evgS</i> | Hybrid sensory histidine kinase in two-component regulatory system | F152L                           | F152L    | F152L    | F152L  | 0.02                             | Benign (0.006)            | Neutral (0.414)      | 83/83                                       |
| <i>evgA</i> | DNA binding transcriptional activator                              | -                               | -        | -        | -      |                                  |                           |                      |                                             |
| <i>phoP</i> | DNA binding transcriptional regulator                              | -                               | K149T    | -        | -      | 0.23                             | Benign (0.002)            | Neutral (-1.112)     | 0/87                                        |
| <i>phoQ</i> | Sensor protein                                                     | -                               | -        | -        | -      |                                  |                           |                      |                                             |
| <i>sdiA</i> | DNA binding transcriptional activator                              | -                               | -        | -        | -      |                                  |                           |                      |                                             |
| <i>rob</i>  | DNA binding transcriptional activator                              | G5C                             | G5C      | G5C      | G5C    | 0.01                             | Possibly damaging (0.822) | Deleterious (-3.302) | 0/86                                        |
| <i>yajC</i> | Preprotein translocase subunit                                     | -                               | -        | -        | -      |                                  |                           |                      |                                             |
|             |                                                                    | I46M                            | I46M     | I46M     | I46M   | 0.22                             | Benign (0,000)            | Neutral (0.893)      | 241/253                                     |
|             |                                                                    | V208I                           | V208I    | V208I    | V208I  | 1.00                             | Benign (0,000)            | Neutral (0.899)      | 222/253                                     |
|             |                                                                    | S365A                           | S365A    | S365A    | S365A  | 1.00                             | Benign (0,000)            | Neutral (2.181)      | 184/253                                     |
| <i>mdtC</i> | Multidrug resistance protein                                       | L387I                           | L387I    | L387I    | L387I  | 0.00                             | Benign (0,394)            | Neutral (-1.572)     | 4/253                                       |
|             |                                                                    | G472V                           | G472V    | G472V    | G472V  | 0.18                             | Benign (0,000)            | Neutral (3.512)      | 17/253                                      |
|             |                                                                    | L910M                           | L910M    | L910M    | L910M  | 0.18                             | Benign (0,000)            | Neutral (0.013)      | 152/248                                     |
| <i>emrA</i> | Sub-unit of efflux pump EmrAB-ToIC                                 | -                               | -        | -        | -      |                                  |                           |                      |                                             |
| <i>emrB</i> | Sub-unit of efflux pump EmrAB-ToIC                                 | -                               | -        | -        | -      |                                  |                           |                      |                                             |
| <i>emrY</i> | Sub-unit of efflux pump EmrYK-ToIC                                 | -                               | -        | -        | -      |                                  |                           |                      |                                             |
| <i>emrK</i> | Sub-unit of efflux pump EmrYK-ToIC                                 | -                               | -        | -        | -      |                                  |                           |                      |                                             |
| <i>ompA</i> | Outer-membran protein A (porin)                                    | -                               | -        | -        | -      |                                  |                           |                      |                                             |
| <i>ompF</i> | Outer-membran protein F (porin)                                    | E139G                           | E139G    | E139G    | E139G  | 0.04                             | Possibly damaging (0.893) | Deleterious (-4.851) | 0/101                                       |
| <i>ompC</i> | Outer-membran porin protein C                                      | -                               | -        | -        | -      |                                  |                           |                      |                                             |
| <i>ompR</i> | Osmolarity response regulator                                      | T149A                           | T149A    | T149A    | T149A  | 0.28                             | Benign (0,001)            | Deleterious (-2.503) | 0/115                                       |
| <i>envZ</i> | Osmolarity sensor protein                                          | -                               | -        | -        | -      |                                  |                           |                      |                                             |

\*Mutations predicted to be deleterious at the protein level at least with two of the three softwares and absent in Uniprot database are highlighted in red

<sup>‡</sup>SIFT software : a score between 0 and 0,05 predicted an alteration of the protein function (altereted) ; a score above 0,05 predicted no alteration (tolerated) : Kumar et al . 2009. Nature protocol. 4:1073-1081

<sup>§</sup>Polyphen-2 software : 3 classes of damaging were predicted : benign, possibly damaged and probably damaged described as follow : Adzhubei et al . 2010. Nature methods. 7(4): 248-249

<sup>§</sup>PROVEAN : a score < -2,5 is predicted as deleterious : Choi et al., 2015.Bioinformatics 31(16): 2745-2747.
