# Supplementary material for: The Odyssey of the Ancestral Escherich Strain through Culture Collections: an Example of Allopatric Diversification
Source: PubMed Central journal article supplement (PMC5793043; doi:10.1128/msphere.00553-17), 2018-01-31
Supplement: sph001182464st6.pdf [file sph001182464st6.pdf]

TABLE S6. List of genes exhibiting Indels and non-synonymous or non-sense SNPs in squatter colonies of the ancestral Escherich strain isolates and absent in the parental isolate

| Squatter colonies isolates | Label of NCTC86_Dunne gene | Gene description                                                                  | Mutation type | Effect   |
|----------------------------|----------------------------|-----------------------------------------------------------------------------------|---------------|----------|
| ATCC4157_S1                | NCTC86EC_RS02620           | 2-succinyl-5-enolpyruvyl-6-hydroxy-3-cyclohexene-1-carboxylate synthase           | Indel         |          |
| ATCC4157_S1                | NCTC86EC_RS04290           | non-ribosomal peptide synthetase                                                  | SNP           | nonsyn   |
| ATCC4157_S1                | NCTC86EC_RS05595           | hypothetical protein                                                              | SNP           | nonsyn   |
| ATCC4157_S1                | NCTC86EC_RS06855           | hypothetical protein                                                              | SNP           | nonsyn   |
| ATCC4157_S1                | NCTC86EC_RS08170           | rha family phage regulatory protein                                               | SNP           | nonsyn   |
| ATCC4157_S1                | NCTC86EC_RS10725           | malate transporter                                                                | Indel         |          |
| ATCC4157_S1                | NCTC86EC_RS10750           | hypothetical protein                                                              | Indel         |          |
| ATCC4157_S1                | NCTC86EC_RS12600           | IS4 family transposase                                                            | Indel         |          |
| ATCC4157_S1                | NCTC86EC_RS13085           | ureidoglycolate dehydrogenase (NAD(+))                                            | SNP           | nonsyn   |
| ATCC4157_S1                | NCTC86EC_RS14715           | RHS element protein                                                               | Indel         |          |
| ATCC4157_S1                | NCTC86EC_RS16645           | glutathione synthetase                                                            | SNP           | nonsyn   |
| ATCC4157_S1                | NCTC86EC_RS19370           | two-component system response regulator OmpR                                      | SNP           | nonsyn   |
| ATCC4157_S1                | NCTC86EC_RS20360           | xylulokinase                                                                      | Indel         |          |
| ATCC4157_S1                | NCTC86EC_RS20525           | hypothetical protein                                                              | Indel         |          |
| ATCC4157_S1                | NCTC86EC_RS22675           | stress-induced protein                                                            | SNP           | nonsyn   |
| ATCC4157_S1                | NCTC86EC_RS23355           | antitoxin                                                                         | SNP           | nonsyn   |
| ATCC4157_S1                | NCTC86EC_RS23370           | hypothetical protein                                                              | SNP           | nonsyn   |
| ATCC4157_S1                | NCTC86EC_RS23370           | hypothetical protein                                                              | SNP           | nonsyn   |
| ATCC4157_S1                | NCTC86EC_RS23370           | hypothetical protein                                                              | SNP           | nonsyn   |
| ATCC4157_S1                | NCTC86EC_RS23370           | hypothetical protein                                                              | SNP           | nonsyn   |
| ATCC4157_S1                | NCTC86EC_RS23535           | glycyl radical enzyme                                                             | SNP           | nonsyn   |
| ATCC4157_S1                | NCTC86EC_RS24775           | hypothetical protein                                                              | SNP           | nonsyn   |
| ATCC4157_S1                | NCTC86EC_RS24785           | GTPase                                                                            | SNP           | nonsyn   |
| ATCC4157_S2                | NCTC86EC_RS00295           | molecular chaperone DjaI                                                          | SNP           | nonsyn   |
| ATCC4157_S2                | NCTC86EC_RS00585           | transcriptional regulator PdhR                                                    | SNP           | nonsyn   |
| ATCC4157_S2                | NCTC86EC_RS00795           | glutamate-1-semialdehyde 2,1-aminomutase                                          | SNP           | nonsyn   |
| ATCC4157_S2                | NCTC86EC_RS01095           | uracil-DNA glycosylase                                                            | SNP           | nonsense |
| ATCC4157_S2                | NCTC86EC_RS01345           | stationary phase inducible protein CsiE                                           | SNP           | nonsyn   |
| ATCC4157_S2                | NCTC86EC_RS01365           | Fe-S cluster assembly transcriptional regulator IscR                              | SNP           | nonsyn   |
| ATCC4157_S2                | NCTC86EC_RS01660           | tRNA cytosine(34) acetyltransferase TmcA                                          | SNP           | nonsyn   |
| ATCC4157_S2                | NCTC86EC_RS01785           | eutA ethanolamine utilization protein EutA                                        | SNP           | nonsense |
| ATCC4157_S2                | NCTC86EC_RS03120           | multiphosphoryl transfer protein                                                  | SNP           | nonsyn   |
| ATCC4157_S2                | NCTC86EC_RS03640           | diguanylate cyclase                                                               | SNP           | nonsyn   |
| ATCC4157_S2                | NCTC86EC_RS04060           | hypothetical protein                                                              | SNP           | nonsyn   |
| ATCC4157_S2                | NCTC86EC_RS04285           | polyketide synthase                                                               | Indel         |          |
| ATCC4157_S2                | NCTC86EC_RS04310           | MFS transporter                                                                   | SNP           | nonsyn   |
| ATCC4157_S2                | NCTC86EC_RS04370           | sensor histidine kinase                                                           | SNP           | nonsyn   |
| ATCC4157_S2                | NCTC86EC_RS04510           | flagellar motor switch protein FlIG                                               | SNP           | nonsyn   |
| ATCC4157_S2                | NCTC86EC_RS05820           | hypothetical protein                                                              | SNP           | nonsyn   |
| ATCC4157_S2                | NCTC86EC_RS05905           | 4Fe-4S ferredoxin                                                                 | SNP           | nonsyn   |
| ATCC4157_S2                | NCTC86EC_RS06250           | arginine/ornithine antiporter transporter                                         | SNP           | nonsyn   |
| ATCC4157_S2                | NCTC86EC_RS06365           | dimethyl sulfoxide reductase subunit A                                            | SNP           | nonsyn   |
| ATCC4157_S2                | NCTC86EC_RS06560           | autoinducer 2 ABC transporter substrate-binding protein                           | Indel         |          |
| ATCC4157_S2                | NCTC86EC_RS06580           | LsrR family transcriptional regulator                                             | SNP           | nonsyn   |
| ATCC4157_S2                | NCTC86EC_RS06590           | hypothetical protein                                                              | Indel         |          |
| ATCC4157_S2                | NCTC86EC_RS06725           | peptide ABC transporter ATP-binding protein                                       | Indel         |          |
| ATCC4157_S2                | NCTC86EC_RS06855           | hypothetical protein                                                              | SNP           | nonsyn   |
| ATCC4157_S2                | NCTC86EC_RS07095           | hypothetical protein                                                              | SNP           | nonsyn   |
| ATCC4157_S2                | NCTC86EC_RS07110           | hypothetical protein                                                              | SNP           | nonsyn   |
| ATCC4157_S2                | NCTC86EC_RS07205           | 1,2-phenylacetyl-CoA epoxidase subunit A                                          | SNP           | nonsyn   |
| ATCC4157_S2                | NCTC86EC_RS07370           | periplasmic murein peptide-binding protein                                        | SNP           | nonsyn   |
| ATCC4157_S2                | NCTC86EC_RS07680           | LysR family transcriptional regulator CysB                                        | SNP           | nonsyn   |
| ATCC4157_S2                | NCTC86EC_RS07835           | phage tail fiber protein                                                          | Indel         |          |
| ATCC4157_S2                | NCTC86EC_RS08515           | sigma-54-dependent Fis family transcriptional regulator                           | SNP           | nonsyn   |
| ATCC4157_S2                | NCTC86EC_RS08565           | K+/H+ antiporter NhaP2                                                            | SNP           | nonsyn   |
| ATCC4157_S2                | NCTC86EC_RS08990           | transcription-repair coupling factor                                              | SNP           | nonsyn   |
| ATCC4157_S2                | NCTC86EC_RS10115           | fimbrial-like adhesin protein                                                     | Indel         |          |
| ATCC4157_S2                | NCTC86EC_RS10480           | hypothetical protein                                                              | SNP           | nonsyn   |
| ATCC4157_S2                | NCTC86EC_RS10665           | IS66 family transposase                                                           | SNP           | nonsyn   |
| ATCC4157_S2                | NCTC86EC_RS10725           | malate transporter                                                                | Indel         |          |
| ATCC4157_S2                | NCTC86EC_RS10750           | hypothetical protein                                                              | Indel         |          |
| ATCC4157_S2                | NCTC86EC_RS10990           | nuclease                                                                          | Indel         |          |
| ATCC4157_S2                | NCTC86EC_RS11255           | multidrug transporter MdfA                                                        | SNP           | nonsyn   |
| ATCC4157_S2                | NCTC86EC_RS11350           | glycyl radical enzyme                                                             | SNP           | nonsyn   |
| ATCC4157_S2                | NCTC86EC_RS11380           | transcriptional regulator MntR                                                    | SNP           | nonsyn   |
| ATCC4157_S2                | NCTC86EC_RS11860           | succinyl-CoA ligase subunit beta                                                  | SNP           | nonsyn   |
| ATCC4157_S2                | NCTC86EC_RS11870           | 2-oxoglutarate dehydrogenase subunit E1                                           | SNP           | nonsyn   |
| ATCC4157_S2                | NCTC86EC_RS12405           | dpIB sensor histidine kinase                                                      | SNP           | nonsyn   |
| ATCC4157_S2                | NCTC86EC_RS12600           | IS4 family transposase                                                            | Indel         |          |
| ATCC4157_S2                | NCTC86EC_RS12605           | protein HokE                                                                      | SNP           | nonsyn   |
| ATCC4157_S2                | NCTC86EC_RS12635           | miniconductance mechanosensitive channel YbdG                                     | SNP           | nonsyn   |
| ATCC4157_S2                | NCTC86EC_RS12670           | two-component sensor histidine kinase                                             | SNP           | nonsyn   |
| ATCC4157_S2                | NCTC86EC_RS12715           | methyltransferase                                                                 | SNP           | nonsyn   |
| ATCC4157_S2                | NCTC86EC_RS13285           | ferrochelatase                                                                    | SNP           | nonsyn   |
| ATCC4157_S2                | NCTC86EC_RS13350           | MexE family multidrug efflux RND transporter periplasmic adaptor subunit          | SNP           | nonsyn   |
| ATCC4157_S2                | NCTC86EC_RS14295           | PaoABC aldehyde oxidoreductase Moco-containing subunit                            | SNP           | nonsyn   |
| ATCC4157_S2                | NCTC86ECAM_2901            | transposase                                                                       | Indel         |          |
| ATCC4157_S2                | NCTC86EC_RS14770           | type VI secretion system protein Impl                                             | SNP           | nonsyn   |
| ATCC4157_S2                | NCTC86EC_RS15720           | rumA 23S rRNA (uracil(1939)-C(5))-methyltransferase RlmD                          | SNP           | nonsyn   |
| ATCC4157_S2                | NCTC86EC_RS15730           | glucarate dehydratase                                                             | SNP           | nonsyn   |
| ATCC4157_S2                | NCTC86EC_RS15905           | pitrilysin                                                                        | SNP           | nonsyn   |
| ATCC4157_S2                | NCTC86EC_RS15990           | bifunctional 2-acylglycerophosphoethanolamine acyltransferase/acyl-ACP synthetase | SNP           | nonsyn   |
| ATCC4157_S2                | NCTC86EC_RS16165           | type III secretion system protein                                                 | SNP           | nonsyn   |
| ATCC4157_S2                | NCTC86EC_RS16215           | sigma-54-dependent Fis family transcriptional regulator                           | SNP           | nonsyn   |
| ATCC4157_S2                | NCTC86EC_RS16380           | 6-phospho-beta-glucosidase                                                        | SNP           | nonsyn   |
| ATCC4157_S2                | NCTC86EC_RS16620           | S-adenosylmethionine synthase                                                     | SNP           | nonsyn   |
| ATCC4157_S2                | NCTC86EC_RS16770           | hypothetical protein                                                              | SNP           | nonsyn   |
| ATCC4157_S2                | NCTC86EC_RS17420           | two-component sensor histidine kinase                                             | SNP           | nonsyn   |
| ATCC4157_S2                | NCTC86EC_RS17460           | ADP-ribose pyrophosphatase                                                        | SNP           | nonsyn   |
| ATCC4157_S2                | NCTC86EC_RS17495           | DUF4051 domain-containing protein                                                 | SNP           | nonsyn   |
| ATCC4157_S2                | NCTC86EC_RS17615           | transcriptional activator TtdR                                                    | SNP           | nonsyn   |
| ATCC4157_S2                | NCTC86EC_RS18035           | outer membrane usher protein YraJ                                                 | SNP           | nonsyn   |
| ATCC4157_S2                | NCTC86EC_RS18065           | osmotically-inducible protein OsmY                                                | SNP           | nonsyn   |
| ATCC4157_S2                | NCTC86EC_RS18070           | permease                                                                          | Indel         |          |
| ATCC4157_S2                | NCTC86EC_RS18160           | translation initiation factor IF-2                                                | SNP           | nonsyn   |
| ATCC4157_S2                | NCTC86EC_RS18270           | acid stress protein IbaG                                                          | SNP           | nonsyn   |
| ATCC4157_S2                | NCTC86EC_RS18300           | hypothetical protein                                                              | SNP           | nonsyn   |
| ATCC4157_S2                | NCTC86EC_RS18400           | outer membrane fimbrial subunit usher protein                                     | SNP           | nonsyn   |
| ATCC4157_S2                | NCTC86EC_RS18510           | IS4 family transposase                                                            | SNP           | nonsyn   |
| ATCC4157_S2                | NCTC86EC_RS18550           | ribonuclease E/G                                                                  | SNP           | nonsyn   |
| ATCC4157_S2                | NCTC86EC_RS19195           | friA fructoselysine transporter                                                   | SNP           | nonsyn   |
| ATCC4157_S2                | NCTC86EC_RS19370           | two-component system response regulator OmpR                                      | SNP           | nonsyn   |
| ATCC4157_S2                | NCTC86EC_RS19380           | transcription accessory protein                                                   | SNP           | nonsyn   |
| ATCC4157_S2                | NCTC86EC_RS19760           | ISAs1 family transposase                                                          | SNP           | nonsyn   |

|             |                  |                                                                                                 |       |          |
|-------------|------------------|-------------------------------------------------------------------------------------------------|-------|----------|
| ATCC4157_S2 | NCTC866C_RS20515 | RHS element protein                                                                             | SNP   | nonsyn   |
| ATCC4157_S2 | NCTC866C_RS20525 | hypothetical protein                                                                            | Indel |          |
| ATCC4157_S2 | NCTC866C_RS21315 | trkD low affinity potassium transport system protein kup                                        | Indel |          |
| ATCC4157_S2 | NCTC866C_RS21435 | transcriptional regulator                                                                       | SNP   | nonsyn   |
| ATCC4157_S2 | NCTC866C_RS21975 | aldose 1-epimerase                                                                              | SNP   | nonsyn   |
| ATCC4157_S2 | NCTC866C_RS22010 | membrane protein                                                                                | SNP   | nonsyn   |
| ATCC4157_S2 | NCTC866C_RS22230 | aquaporin                                                                                       | SNP   | nonsyn   |
| ATCC4157_S2 | NCTC866C_RS22380 | phosphoenolpyruvate carboxylase                                                                 | SNP   | nonsyn   |
| ATCC4157_S2 | NCTC866C_RS22395 | N-acetyl-gamma-glutamyl-phosphate reductase                                                     | SNP   | nonsyn   |
| ATCC4157_S2 | NCTC866C_RS22845 | glycerol-3-phosphate 1-O-acyltransferase                                                        | SNP   | nonsyn   |
| ATCC4157_S2 | NCTC866C_RS22970 | Na <sup>+</sup> /H <sup>+</sup> antiporter                                                      | SNP   | nonsyn   |
| ATCC4157_S2 | NCTC866C_RS23030 | glutamate/aspartate:proton symporter GltP                                                       | SNP   | nonsyn   |
| ATCC4157_S2 | NCTC866C_RS23050 | multidrug resistance outer membrane protein MdtP                                                | SNP   | nonsyn   |
| ATCC4157_S2 | NCTC866C_RS23200 | YjcZ family protein; yjhJ motility defect suppressor                                            | SNP   | nonsyn   |
| ATCC4157_S2 | NCTC866C_RS23330 | cadB cadaverine/lysine antiporter                                                               | SNP   | nonsyn   |
| ATCC4157_S2 | NCTC866C_RS23355 | antitoxin                                                                                       | SNP   | nonsyn   |
| ATCC4157_S2 | NCTC866C_RS23370 | hypothetical protein                                                                            | SNP   | nonsyn   |
| ATCC4157_S2 | NCTC866C_RS23370 | hypothetical protein                                                                            | SNP   | nonsyn   |
| ATCC4157_S2 | NCTC866C_RS23370 | hypothetical protein                                                                            | SNP   | nonsyn   |
| ATCC4157_S2 | NCTC866C_RS23370 | hypothetical protein                                                                            | SNP   | nonsyn   |
| ATCC4157_S2 | NCTC866C_RS23440 | pseudouridine kinase                                                                            | SNP   | nonsyn   |
| ATCC4157_S2 | NCTC866C_RS23450 | nucleoside permease                                                                             | SNP   | nonsyn   |
| ATCC4157_S2 | NCTC866C_RS23750 | hypothetical protein                                                                            | SNP   | nonsyn   |
| ATCC4157_S2 | NCTC866C_RS23760 | molecular chaperone GroEL                                                                       | SNP   | nonsyn   |
| ATCC4157_S2 | NCTC866C_RS24115 | OspA family protein                                                                             | SNP   | nonsyn   |
| ATCC4157_S2 | NCTC866C_RS24775 | hypothetical protein                                                                            | SNP   | nonsyn   |
| ATCC4157_S2 | NCTC866C_RS24785 | GTPase                                                                                          | SNP   | nonsyn   |
| ATCC4157_S2 | NCTC866C_RS25005 | isoaspartyl dipeptidase                                                                         | SNP   | nonsyn   |
| ATCC4157_S2 | NCTC866C_RS25280 | lplA lipotein-protein ligase                                                                    | SNP   | nonsyn   |
| ATCC4157_S3 | NCTC866C_RS01660 | tRNA cytosine(34) acetyltransferase Tmca                                                        | SNP   | nonsyn   |
| ATCC4157_S3 | NCTC866C_RS03640 | diguanylate cyclase                                                                             | SNP   | nonsyn   |
| ATCC4157_S3 | NCTC866C_RS25625 | transposase                                                                                     | SNP   | nonsyn   |
| ATCC4157_S3 | NCTC866C_RS04290 | non-ribosomal peptide synthetase                                                                | SNP   | nonsyn   |
| ATCC4157_S3 | NCTC866C_RS05740 | phosphoenolpyruvate synthase                                                                    | SNP   | nonsyn   |
| ATCC4157_S3 | NCTC866C_RS05820 | hypothetical protein                                                                            | SNP   | nonsyn   |
| ATCC4157_S3 | NCTC866C_RS05905 | 4Fe-4S ferredoxin                                                                               | SNP   | nonsyn   |
| ATCC4157_S3 | NCTC866C_RS06590 | hypothetical protein                                                                            | Indel |          |
| ATCC4157_S3 | NCTC866C_RS06855 | hypothetical protein                                                                            | SNP   | nonsyn   |
| ATCC4157_S3 | NCTC866C_RS08170 | rha family phage regulatory protein                                                             | SNP   | nonsyn   |
| ATCC4157_S3 | NCTC866C_RS09560 | transposase                                                                                     | SNP   | nonsyn   |
| ATCC4157_S3 | NCTC866C_RS10665 | IS66 family transposase                                                                         | SNP   | nonsyn   |
| ATCC4157_S3 | NCTC866C_RS10725 | malate transporter                                                                              | Indel |          |
| ATCC4157_S3 | NCTC866C_RS10750 | hypothetical protein                                                                            | Indel |          |
| ATCC4157_S3 | NCTC866C_RS12600 | IS4 family transposase                                                                          | Indel |          |
| ATCC4157_S3 | NCTC866C_RS13350 | MexE family multidrug efflux RND transporter periplasmic adaptor subunit                        | SNP   | nonsyn   |
| ATCC4157_S3 | NCTC866C_RS14715 | RHS element protein                                                                             | Indel |          |
| ATCC4157_S3 | NCTC866C_RS16645 | glutathione synthetase                                                                          | SNP   | nonsyn   |
| ATCC4157_S3 | NCTC866C_RS17460 | ADP-ribose pyrophosphatase                                                                      | SNP   | nonsyn   |
| ATCC4157_S3 | NCTC866C_RS17615 | transcriptional activator TtdR                                                                  | SNP   | nonsyn   |
| ATCC4157_S3 | NCTC866C_RS17845 | LysR family transcriptional regulator                                                           | SNP   | nonsyn   |
| ATCC4157_S3 | NCTC866C_RS18400 | outer membrane fimbrial subunit usher protein                                                   | SNP   | nonsyn   |
| ATCC4157_S3 | NCTC866C_RS18510 | IS4 family transposase                                                                          | SNP   | nonsyn   |
| ATCC4157_S3 | NCTC866C_RS19370 | two-component system response regulator OmpR                                                    | SNP   | nonsyn   |
| ATCC4157_S3 | NCTC866C_RS20515 | RHS element protein                                                                             | SNP   | nonsyn   |
| ATCC4157_S3 | NCTC866C_RS20525 | hypothetical protein                                                                            | Indel |          |
| ATCC4157_S3 | NCTC866C_RS21920 | two-component system sensor histidine kinase NtrB                                               | SNP   | nonsyn   |
| ATCC4157_S3 | NCTC866C_RS22675 | stress-induced protein                                                                          | SNP   | nonsyn   |
| ATCC4157_S3 | NCTC866C_RS23030 | glutamate/aspartate:proton symporter GltP                                                       | SNP   | nonsyn   |
| ATCC4157_S3 | NCTC866C_RS23355 | antitoxin                                                                                       | SNP   | nonsyn   |
| ATCC4157_S3 | NCTC866C_RS23370 | hypothetical protein                                                                            | SNP   | nonsyn   |
| ATCC4157_S3 | NCTC866C_RS23370 | hypothetical protein                                                                            | SNP   | nonsyn   |
| ATCC4157_S3 | NCTC866C_RS23370 | hypothetical protein                                                                            | SNP   | nonsyn   |
| ATCC4157_S3 | NCTC866C_RS23370 | hypothetical protein                                                                            | SNP   | nonsyn   |
| ATCC4157_S3 | NCTC866C_RS23440 | pseudouridine kinase                                                                            | SNP   | nonsyn   |
| ATCC4157_S3 | NCTC866C_RS23450 | nucleoside permease                                                                             | SNP   | nonsyn   |
| ATCC4157_S3 | NCTC866C_RS23535 | glycyl radical enzyme                                                                           | SNP   | nonsyn   |
| ATCC4157_S3 | NCTC866C_RS23750 | hypothetical protein                                                                            | SNP   | nonsyn   |
| ATCC4157_S3 | NCTC866C_RS24775 | hypothetical protein                                                                            | SNP   | nonsyn   |
| ATCC4157_S3 | NCTC866C_RS24785 | GTPase                                                                                          | SNP   | nonsyn   |
| NCTC86_S1   | NCTC866C_RS00135 | isoleucine-tRNA ligase                                                                          | SNP   | nonsyn   |
| NCTC86_S1   | NCTC866C_RS00355 | thiamine-binding periplasmic protein                                                            | SNP   | nonsyn   |
| NCTC86_S1   | NCTC866C_RS00585 | transcriptional regulator PdhR                                                                  | SNP   | nonsyn   |
| NCTC86_S1   | NCTC866C_RS00595 | aceF dihydrodipolyllysine-residue acetyltransferase component of pyruvate dehydrogenase complex | SNP   | nonsyn   |
| NCTC86_S1   | NCTC866C_RS00760 | ATP-dependent helicase HrpB                                                                     | Indel |          |
| NCTC86_S1   | NCTC866C_RS01125 | tRNA (adenosine(37)-N6)-methyltransferase TrmM                                                  | Indel |          |
| NCTC86_S1   | NCTC866C_RS01160 | elongation factor 4                                                                             | SNP   | nonsyn   |
| NCTC86_S1   | NCTC866C_RS01275 | DUF4380 domain-containing protein                                                               | SNP   | nonsense |
| NCTC86_S1   | NCTC866C_RS01275 | DUF4380 domain-containing protein                                                               | Indel |          |
| NCTC86_S1   | NCTC866C_RS01390 | Fe-S protein assembly chaperone HscA                                                            | SNP   | nonsyn   |
| NCTC86_S1   | NCTC866C_RS01600 | hyfE hydrogenase-4 component E                                                                  | SNP   | nonsyn   |
| NCTC86_S1   | NCTC866C_RS01640 | outer membrane protein assembly factor BamC                                                     | SNP   | nonsyn   |
| NCTC86_S1   | NCTC866C_RS01890 | cysteine synthase B                                                                             | SNP   | nonsyn   |
| NCTC86_S1   | NCTC866C_RS02365 | protein DedD                                                                                    | SNP   | nonsyn   |
| NCTC86_S1   | NCTC866C_RS02650 | 4-amino-4-deoxy-L-arabinose-phospho-UDP flippase                                                | SNP   | nonsyn   |
| NCTC86_S1   | NCTC866C_RS02790 | autotransporter outer membrane beta-barrel domain-containing protein                            | SNP   | nonsyn   |
| NCTC86_S1   | NCTC866C_RS02815 | hypothetical protein                                                                            | SNP   | nonsyn   |
| NCTC86_S1   | NCTC866C_RS02940 | ferredoxin-type protein NapG                                                                    | SNP   | nonsyn   |
| NCTC86_S1   | NCTC866C_RS03230 | galactose/methyl galactoside import ATP-binding protein MglA                                    | SNP   | nonsyn   |
| NCTC86_S1   | NCTC866C_RS03285 | multidrug transporter permease                                                                  | SNP   | nonsyn   |
| NCTC86_S1   | NCTC866C_RS03320 | ABC transporter substrate-binding protein                                                       | SNP   | nonsyn   |
| NCTC86_S1   | NCTC866C_RS03490 | sugar kinase                                                                                    | SNP   | nonsyn   |
| NCTC86_S1   | NCTC866C_RS03705 | putative colanic acid polymerase WcaD                                                           | SNP   | nonsyn   |
| NCTC86_S1   | NCTC866C_RS03810 | capsular biosynthesis protein                                                                   | SNP   | nonsyn   |
| NCTC86_S1   | NCTC866C_RS25625 | transposase                                                                                     | Indel |          |
| NCTC86_S1   | NCTC866C_RS04575 | RNA polymerase sigma factor FliA                                                                | SNP   | nonsyn   |
| NCTC86_S1   | NCTC866C_RS04655 | tyrosine transporter TyrP                                                                       | SNP   | nonsyn   |
| NCTC86_S1   | NCTC866C_RS05635 | membrane protein                                                                                | SNP   | nonsyn   |
| NCTC86_S1   | NCTC866C_RS06680 | glutamate decarboxylase                                                                         | SNP   | nonsyn   |
| NCTC86_S1   | NCTC866C_RS06805 | respiratory nitrate reductase 2 alpha chain                                                     | SNP   | nonsyn   |
| NCTC86_S1   | NCTC866C_RS07275 | tRNA 2-thiocytidine(32) synthetase TtcA                                                         | Indel |          |
| NCTC86_S1   | NCTC866C_RS07275 | tRNA 2-thiocytidine(32) synthetase TtcA                                                         | SNP   | nonsyn   |
| NCTC86_S1   | NCTC866C_RS07505 | phage shock protein PspA                                                                        | SNP   | nonsyn   |
| NCTC86_S1   | NCTC866C_RS07655 | GTP cyclohydrolase II                                                                           | SNP   | nonsyn   |
| NCTC86_S1   | NCTC866C_RS08270 | oligopeptide ABC transporter substrate-binding protein OppA                                     | SNP   | nonsyn   |
| NCTC86_S1   | NCTC866C_RS08510 | adhesin                                                                                         | SNP   | nonsyn   |
| NCTC86_S1   | NCTC866C_RS09055 | PTS glucose EIICB component                                                                     | SNP   | nonsyn   |
| NCTC86_S1   | NCTC866C_RS09160 | flagellar P-ring protein                                                                        | SNP   | nonsyn   |

|           |                  |                                                                                                                   |       |          |
|-----------|------------------|-------------------------------------------------------------------------------------------------------------------|-------|----------|
| NCTC86_S1 | NCTC86EC_RS09880 | hypothetical protein                                                                                              | SNP   | nonsyn   |
| NCTC86_S1 | NCTC86EC_RS10015 | hypothetical protein                                                                                              | SNP   | nonsyn   |
| NCTC86_S1 | NCTC86EC_RS10095 | dihydroorotate dehydrogenase 2                                                                                    | SNP   | nonsyn   |
| NCTC86_S1 | NCTC86EC_RS10270 | 30S ribosomal protein S1                                                                                          | SNP   | nonsyn   |
| NCTC86_S1 | NCTC86EC_RS10315 | formate C-acetyltransferase                                                                                       | SNP   | nonsyn   |
| NCTC86_S1 | NCTC86EC_RS10360 | dimethyl sulfoxide reductase subunit A                                                                            | SNP   | nonsyn   |
| NCTC86_S1 | NCTC86EC_RS10530 | restriction endonuclease                                                                                          | SNP   | nonsense |
| NCTC86_S1 | NCTC86EC_RS10595 | pilin outer membrane usher protein SafC                                                                           | Indel |          |
| NCTC86_S1 | NCTC86EC_RS10725 | malate transporter                                                                                                | SNP   | nonsyn   |
| NCTC86_S1 | NCTC86EC_RS10745 | macrolide ABC transporter ATP-binding protein                                                                     | Indel |          |
| NCTC86_S1 | NCTC86EC_RS10750 | hypothetical protein                                                                                              | Indel |          |
| NCTC86_S1 | NCTC86EC_RS10755 | hypothetical protein                                                                                              | Indel |          |
| NCTC86_S1 | NCTC86EC_RS10840 | DNA-binding protein                                                                                               | SNP   | nonsyn   |
| NCTC86_S1 | NCTC86EC_RS11050 | ATP-dependent Clp protease adaptor ClpS                                                                           | SNP   | nonsyn   |
| NCTC86_S1 | NCTC86EC_RS11085 | aquaporin                                                                                                         | SNP   | nonsyn   |
| NCTC86_S1 | NCTC86EC_RS11095 | hydroxylamine reductase                                                                                           | SNP   | nonsyn   |
| NCTC86_S1 | NCTC86EC_RS11350 | glycyl radical enzyme                                                                                             | SNP   | nonsyn   |
| NCTC86_S1 | NCTC86EC_RS12035 | two-component system sensor histidine kinase KdbD                                                                 | SNP   | nonsyn   |
| NCTC86_S1 | NCTC86EC_RS12130 | PTS N-acetylglucosamine EIICBA component                                                                          | SNP   | nonsyn   |
| NCTC86_S1 | NCTC86EC_RS12495 | hypothetical protein                                                                                              | Indel |          |
| NCTC86_S1 | NCTC86EC_RS12600 | IS4 family transposase                                                                                            | Indel |          |
| NCTC86_S1 | NCTC86EC_RS12645 | cation transporter                                                                                                | SNP   | nonsyn   |
| NCTC86_S1 | NCTC86EC_RS12660 | cation efflux system protein CusC                                                                                 | SNP   | nonsyn   |
| NCTC86_S1 | NCTC86EC_RS13860 | microcin transporter                                                                                              | SNP   | nonsyn   |
| NCTC86_S1 | NCTC86EC_RS14015 | cyanate transporter                                                                                               | SNP   | nonsense |
| NCTC86_S1 | NCTC86EC_RS14035 | cytosine deaminase                                                                                                | SNP   | nonsyn   |
| NCTC86_S1 | NCTC86EC_RS14050 | 2-methylcitrate dehydratase                                                                                       | SNP   | nonsyn   |
| NCTC86_S1 | NCTC86EC_RS14065 | propionate catabolism operon regulatory protein PrpR                                                              | SNP   | nonsyn   |
| NCTC86_S1 | NCTC86EC_RS14710 | hypothetical protein                                                                                              | Indel |          |
| NCTC86_S1 | NCTC86EC_RS14795 | type VI secretion system-associated protein                                                                       | SNP   | nonsyn   |
| NCTC86_S1 | NCTC86EC_RS14915 | chaperone protein ClpB                                                                                            | SNP   | nonsyn   |
| NCTC86_S1 | NCTC86EC_RS15000 | 30S ribosomal protein S16                                                                                         | SNP   | nonsyn   |
| NCTC86_S1 | NCTC86EC_RS15000 | CRISPR-associated helicase/endonuclease Cas3                                                                      | SNP   | nonsyn   |
| NCTC86_S1 | NCTC86EC_RS15990 | bifunctional 2-acylglycerolphosphoethanolamine acyltransferase/acyl-ACP synthetase                                | SNP   | nonsyn   |
| NCTC86_S1 | NCTC86EC_RS16450 | transcriptional regulator ArgP                                                                                    | SNP   | nonsyn   |
| NCTC86_S1 | NCTC86EC_RS16585 | hypothetical protein                                                                                              | SNP   | nonsyn   |
| NCTC86_S1 | NCTC86EC_RS17020 | restriction endonuclease subunit M                                                                                | SNP   | nonsyn   |
| NCTC86_S1 | NCTC86EC_RS17100 | polysialic acid transporter                                                                                       | Indel |          |
| NCTC86_S1 | NCTC86EC_RS17170 | acyl-CoA synthetase                                                                                               | SNP   | nonsyn   |
| NCTC86_S1 | NCTC86EC_RS17690 | transcriptional regulator                                                                                         | SNP   | nonsyn   |
| NCTC86_S1 | NCTC86EC_RS18655 | efflux transporter periplasmic adaptor subunit                                                                    | SNP   | nonsyn   |
| NCTC86_S1 | NCTC86EC_RS18995 | general secretory pathway protein                                                                                 | SNP   | nonsyn   |
| NCTC86_S1 | NCTC86EC_RS19090 | glutathione-regulated potassium-efflux system protein KefB                                                        | SNP   | nonsyn   |
| NCTC86_S1 | NCTC86EC_RS19165 | MFS transporter                                                                                                   | SNP   | nonsyn   |
| NCTC86_S1 | NCTC86EC_RS19370 | two-component system response regulator OmpR                                                                      | SNP   | nonsyn   |
| NCTC86_S1 | NCTC86EC_RS19415 | Fe-S biogenesis protein NfuA                                                                                      | SNP   | nonsyn   |
| NCTC86_S1 | NCTC86EC_RS19435 | transcriptional regulator MalT                                                                                    | SNP   | nonsyn   |
| NCTC86_S1 | NCTC86EC_RS20515 | RHS element protein                                                                                               | SNP   | nonsyn   |
| NCTC86_S1 | NCTC86EC_RS20525 | hypothetical protein                                                                                              | Indel |          |
| NCTC86_S1 | NCTC86EC_RS20965 | sulfatase/phosphatase superfamily protein                                                                         | SNP   | nonsyn   |
| NCTC86_S1 | NCTC86EC_RS21495 | polysaccharide chain length modulation protein                                                                    | Indel |          |
| NCTC86_S1 | NCTC86EC_RS21515 | glucose-1-phosphate thymidyltransferase 2                                                                         | SNP   | nonsyn   |
| NCTC86_S1 | NCTC86EC_RS21540 | enterobacterial common antigen polymerase                                                                         | SNP   | nonsyn   |
| NCTC86_S1 | NCTC86EC_RS21550 | transporter                                                                                                       | Indel |          |
| NCTC86_S1 | NCTC86EC_RS21590 | uroporphyrinogen-III C-methyltransferase                                                                          | SNP   | nonsyn   |
| NCTC86_S1 | NCTC86EC_RS22790 | malG maltose ABC transporter permease                                                                             | SNP   | nonsyn   |
| NCTC86_S1 | NCTC86EC_RS22830 | hypothetical protein                                                                                              | SNP   | nonsyn   |
| NCTC86_S1 | NCTC86EC_RS22975 | hypothetical protein                                                                                              | SNP   | nonsyn   |
| NCTC86_S1 | NCTC86EC_RS23145 | alpha-D-ribose 1-methylphosphonate 5-phosphate C-P-lyase                                                          | SNP   | nonsyn   |
| NCTC86_S1 | NCTC86EC_RS23240 | arginine decarboxylase                                                                                            | SNP   | nonsyn   |
| NCTC86_S1 | NCTC86EC_RS23450 | nucleoside permease                                                                                               | Indel |          |
| NCTC86_S1 | NCTC86EC_RS24510 | PTS glucose transporter subunit IIB                                                                               | SNP   | nonsyn   |
| NCTC86_S1 | NCTC86EC_RS24705 | fec operon regulator FecR                                                                                         | SNP   | nonsyn   |
| NCTC86_S1 | NCTC86EC_RS24780 | hypothetical protein                                                                                              | Indel |          |
| NCTC86_S1 | NCTC86EC_RS24805 | hypothetical protein                                                                                              | SNP   | nonsyn   |
| NCTC86_S1 | NCTC86EC_RS24860 | hypothetical protein                                                                                              | SNP   | nonsyn   |
| NCTC86_S1 | NCTC86EC_RS25300 | trifunctional nicotinamide-nucleotide adenyltransferase/ribosylnicotinamide kinase/transcriptional regulator NadR | Indel |          |
| NCTC86_S2 | NCTC86EC_RS00135 | isoleucine--tRNA ligase                                                                                           | SNP   | nonsyn   |
| NCTC86_S2 | NCTC86EC_RS00355 | thiamine-binding periplasmic protein                                                                              | SNP   | nonsyn   |
| NCTC86_S2 | NCTC86EC_RS00585 | transcriptional regulator PdhR                                                                                    | SNP   | nonsyn   |
| NCTC86_S2 | NCTC86EC_RS00595 | aceF dihydrolypolyllysine-residue acetyltransferase component of pyruvate dehydrogenase complex                   | SNP   | nonsyn   |
| NCTC86_S2 | NCTC86EC_RS00760 | ATP-dependent helicase HrpB                                                                                       | Indel |          |
| NCTC86_S2 | NCTC86EC_RS01010 | DL-methionine transporter substrate-binding subunit                                                               | Indel |          |
| NCTC86_S2 | NCTC86EC_RS01125 | tRNA (adenosine[37]-N6)-methyltransferase TrmM                                                                    | Indel |          |
| NCTC86_S2 | NCTC86EC_RS01160 | elongation factor 4                                                                                               | SNP   | nonsyn   |
| NCTC86_S2 | NCTC86EC_RS01275 | DUF4380 domain-containing protein                                                                                 | SNP   | nonsense |
| NCTC86_S2 | NCTC86EC_RS01390 | Fe-S protein assembly chaperone HscA                                                                              | SNP   | nonsyn   |
| NCTC86_S2 | NCTC86EC_RS01600 | hyfE hydrogenase-4 component E                                                                                    | SNP   | nonsyn   |
| NCTC86_S2 | NCTC86EC_RS01640 | outer membrane protein assembly factor BamC                                                                       | SNP   | nonsyn   |
| NCTC86_S2 | NCTC86EC_RS01890 | cysteine synthase B                                                                                               | SNP   | nonsyn   |
| NCTC86_S2 | NCTC86EC_RS02150 | transporter                                                                                                       | SNP   | nonsyn   |
| NCTC86_S2 | NCTC86EC_RS02365 | protein DedD                                                                                                      | SNP   | nonsyn   |
| NCTC86_S2 | NCTC86EC_RS02650 | 4-amino-4-deoxy-L-arabinose-phospho-UDP flippase                                                                  | SNP   | nonsyn   |
| NCTC86_S2 | NCTC86EC_RS02790 | autotransporter outer membrane beta-barrel domain-containing protein                                              | SNP   | nonsyn   |
| NCTC86_S2 | NCTC86EC_RS02815 | hypothetical protein                                                                                              | SNP   | nonsyn   |
| NCTC86_S2 | NCTC86EC_RS02940 | ferredoxin-type protein NapG                                                                                      | SNP   | nonsyn   |
| NCTC86_S2 | NCTC86EC_RS03230 | galactose/methyl galactoside import ATP-binding protein MglA                                                      | SNP   | nonsyn   |
| NCTC86_S2 | NCTC86EC_RS03285 | multidrug transporter permease                                                                                    | SNP   | nonsyn   |
| NCTC86_S2 | NCTC86EC_RS03320 | ABC transporter substrate-binding protein                                                                         | SNP   | nonsyn   |
| NCTC86_S2 | NCTC86EC_RS03490 | sugar kinase                                                                                                      | SNP   | nonsyn   |
| NCTC86_S2 | NCTC86EC_RS03705 | putative colanic acid polymerase WcaD                                                                             | SNP   | nonsyn   |
| NCTC86_S2 | NCTC86EC_RS03810 | capsular biosynthesis protein                                                                                     | SNP   | nonsyn   |
| NCTC86_S2 | NCTC86EC_RS25625 | transposase                                                                                                       | Indel |          |
| NCTC86_S2 | NCTC86EC_RS04575 | RNA polymerase sigma factor FlIA                                                                                  | SNP   | nonsyn   |
| NCTC86_S2 | NCTC86EC_RS04655 | tyrosine transporter TyrP                                                                                         | SNP   | nonsyn   |
| NCTC86_S2 | NCTC86EC_RS05635 | membrane protein                                                                                                  | SNP   | nonsyn   |
| NCTC86_S2 | NCTC86EC_RS06680 | glutamate decarboxylase                                                                                           | SNP   | nonsyn   |
| NCTC86_S2 | NCTC86EC_RS06805 | respiratory nitrate reductase 2 alpha chain                                                                       | SNP   | nonsyn   |
| NCTC86_S2 | NCTC86EC_RS07275 | tRNA 2-thiocytidine(32) synthetase TtcA                                                                           | Indel |          |
| NCTC86_S2 | NCTC86EC_RS07275 | tRNA 2-thiocytidine(32) synthetase TtcA                                                                           | SNP   | nonsyn   |
| NCTC86_S2 | NCTC86EC_RS07345 | methylated-DNA--protein-cysteine methyltransferase                                                                | Indel |          |
| NCTC86_S2 | NCTC86EC_RS07505 | phage shock protein PspA                                                                                          | SNP   | nonsyn   |
| NCTC86_S2 | NCTC86EC_RS07655 | GTP cyclohydrolase II                                                                                             | SNP   | nonsyn   |
| NCTC86_S2 | NCTC86EC_RS08270 | oligopeptide ABC transporter substrate-binding protein OppA                                                       | SNP   | nonsyn   |
| NCTC86_S2 | NCTC86EC_RS08510 | adhesin                                                                                                           | SNP   | nonsyn   |
| NCTC86_S2 | NCTC86EC_RS09055 | PTS glucose EIICB component                                                                                       | SNP   | nonsyn   |
| NCTC86_S2 | NCTC86EC_RS09160 | flgl flagellar P-ring protein                                                                                     | SNP   | nonsyn   |

|           |                  |                                                                                                                   |       |          |
|-----------|------------------|-------------------------------------------------------------------------------------------------------------------|-------|----------|
| NCTC86_S2 | NCTC86EC_RS09600 | IS110 family transposase                                                                                          | SNP   | nonsyn   |
| NCTC86_S2 | NCTC86EC_RS09880 | hypothetical protein                                                                                              | SNP   | nonsyn   |
| NCTC86_S2 | NCTC86EC_RS10015 | hypothetical protein                                                                                              | SNP   | nonsyn   |
| NCTC86_S2 | NCTC86EC_RS10095 | dihydroorotate dehydrogenase 2                                                                                    | SNP   | nonsyn   |
| NCTC86_S2 | NCTC86EC_RS10270 | 30S ribosomal protein S1                                                                                          | SNP   | nonsyn   |
| NCTC86_S2 | NCTC86EC_RS10315 | formate C-acetyltransferase                                                                                       | SNP   | nonsyn   |
| NCTC86_S2 | NCTC86EC_RS10360 | dimethyl sulfoxide reductase subunit A                                                                            | SNP   | nonsyn   |
| NCTC86_S2 | NCTC86EC_RS10530 | restriction endonuclease                                                                                          | SNP   | nonsense |
| NCTC86_S2 | NCTC86EC_RS10725 | malate transporter                                                                                                | SNP   | nonsyn   |
| NCTC86_S2 | NCTC86EC_RS10745 | macrolide ABC transporter ATP-binding protein                                                                     | Indel |          |
| NCTC86_S2 | NCTC86EC_RS10750 | hypothetical protein                                                                                              | Indel |          |
| NCTC86_S2 | NCTC86EC_RS10755 | hypothetical protein                                                                                              | Indel |          |
| NCTC86_S2 | NCTC86EC_RS10840 | DNA-binding protein                                                                                               | SNP   | nonsyn   |
| NCTC86_S2 | NCTC86EC_RS11095 | hydroxylamine reductase                                                                                           | SNP   | nonsyn   |
| NCTC86_S2 | NCTC86EC_RS11350 | glycyl radical enzyme                                                                                             | SNP   | nonsyn   |
| NCTC86_S2 | NCTC86EC_RS12035 | two-component system sensor histidine kinase KdbD                                                                 | SNP   | nonsyn   |
| NCTC86_S2 | NCTC86EC_RS12130 | PTS N-acetylglucosamine EICBA component                                                                           | SNP   | nonsyn   |
| NCTC86_S2 | NCTC86EC_RS12495 | hypothetical protein                                                                                              | Indel |          |
| NCTC86_S2 | NCTC86EC_RS12645 | cation transporter                                                                                                | SNP   | nonsyn   |
| NCTC86_S2 | NCTC86EC_RS12660 | cation efflux system protein CusC                                                                                 | SNP   | nonsyn   |
| NCTC86_S2 | NCTC86EC_RS14015 | cyanate transporter                                                                                               | SNP   | nonsense |
| NCTC86_S2 | NCTC86EC_RS14050 | 2-methylcitrate dehydratase                                                                                       | SNP   | nonsyn   |
| NCTC86_S2 | NCTC86EC_RS14065 | propionate catabolism operon regulatory protein PrpR                                                              | SNP   | nonsyn   |
| NCTC86_S2 | NCTC86EC_RS14795 | type VI secretion system-associated protein                                                                       | SNP   | nonsyn   |
| NCTC86_S2 | NCTC86EC_RS14915 | chaperone protein ClpB                                                                                            | SNP   | nonsyn   |
| NCTC86_S2 | NCTC86EC_RS15000 | 30S ribosomal protein S16                                                                                         | SNP   | nonsyn   |
| NCTC86_S2 | NCTC86EC_RS15600 | CRISPR-associated helicase/endonuclease Cas3                                                                      | SNP   | nonsyn   |
| NCTC86_S2 | NCTC86EC_RS15990 | bifunctional 2-acylglycerophosphoethanolamine acyltransferase/acyl-ACP synthetase                                 | SNP   | nonsyn   |
| NCTC86_S2 | NCTC86EC_RS16450 | transcriptional regulator ArgP                                                                                    | SNP   | nonsyn   |
| NCTC86_S2 | NCTC86EC_RS16585 | hypothetical protein                                                                                              | SNP   | nonsyn   |
| NCTC86_S2 | NCTC86EC_RS17020 | restriction endonuclease subunit M                                                                                | SNP   | nonsyn   |
| NCTC86_S2 | NCTC86EC_RS17100 | polysialic acid transporter                                                                                       | Indel |          |
| NCTC86_S2 | NCTC86EC_RS17170 | acyl-CoA synthetase                                                                                               | SNP   | nonsyn   |
| NCTC86_S2 | NCTC86EC_RS17690 | transcriptional regulator                                                                                         | SNP   | nonsyn   |
| NCTC86_S2 | NCTC86EC_RS17790 | GntR family transcriptional regulator                                                                             | Indel |          |
| NCTC86_S2 | NCTC86EC_RS17840 | DUF805 domain-containing protein                                                                                  | Indel |          |
| NCTC86_S2 | NCTC86EC_RS18655 | efflux transporter periplasmic adaptor subunit                                                                    | SNP   | nonsyn   |
| NCTC86_S2 | NCTC86EC_RS18995 | general secretory pathway protein                                                                                 | SNP   | nonsyn   |
| NCTC86_S2 | NCTC86EC_RS19090 | glutathione-regulated potassium-efflux system protein KefB                                                        | SNP   | nonsyn   |
| NCTC86_S2 | NCTC86EC_RS19370 | two-component system response regulator OmpR                                                                      | SNP   | nonsyn   |
| NCTC86_S2 | NCTC86EC_RS19415 | Fe-S biogenesis protein NfuA                                                                                      | SNP   | nonsyn   |
| NCTC86_S2 | NCTC86EC_RS19435 | transcriptional regulator MalT                                                                                    | SNP   | nonsyn   |
| NCTC86_S2 | NCTC86EC_RS20515 | RHS element protein                                                                                               | SNP   | nonsyn   |
| NCTC86_S2 | NCTC86EC_RS20525 | hypothetical protein                                                                                              | Indel |          |
| NCTC86_S2 | NCTC86EC_RS20965 | sulfatase/phosphatase superfamily protein                                                                         | SNP   | nonsyn   |
| NCTC86_S2 | NCTC86EC_RS21495 | polysaccharide chain length modulation protein                                                                    | Indel |          |
| NCTC86_S2 | NCTC86EC_RS21515 | glucose-1-phosphate thymidyltransferase 2                                                                         | SNP   | nonsyn   |
| NCTC86_S2 | NCTC86EC_RS21540 | enterobacterial common antigen polymerase                                                                         | SNP   | nonsyn   |
| NCTC86_S2 | NCTC86EC_RS21550 | transporter                                                                                                       | Indel |          |
| NCTC86_S2 | NCTC86EC_RS21590 | uroporphyrinogen-III C-methyltransferase                                                                          | SNP   | nonsyn   |
| NCTC86_S2 | NCTC86EC_RS22790 | malG maltose ABC transporter permease                                                                             | SNP   | nonsyn   |
| NCTC86_S2 | NCTC86EC_RS22830 | hypothetical protein                                                                                              | SNP   | nonsyn   |
| NCTC86_S2 | NCTC86EC_RS22900 | replicative DNA helicase                                                                                          | SNP   | nonsyn   |
| NCTC86_S2 | NCTC86EC_RS22975 | hypothetical protein                                                                                              | SNP   | nonsyn   |
| NCTC86_S2 | NCTC86EC_RS23145 | alpha-D-ribose 1-methylphosphonate 5-phosphate C-P-lyase                                                          | SNP   | nonsyn   |
| NCTC86_S2 | NCTC86EC_RS23240 | arginine decarboxylase                                                                                            | SNP   | nonsyn   |
| NCTC86_S2 | NCTC86EC_RS23450 | nucleoside permease                                                                                               | Indel |          |
| NCTC86_S2 | NCTC86EC_RS24705 | fec operon regulator FecR                                                                                         | SNP   | nonsyn   |
| NCTC86_S2 | NCTC86EC_RS24780 | hypothetical protein                                                                                              | Indel |          |
| NCTC86_S2 | NCTC86EC_RS24805 | hypothetical protein                                                                                              | SNP   | nonsyn   |
| NCTC86_S2 | NCTC86EC_RS25300 | trifunctional nicotinamide-nucleotide adenyltransferase/ribosylnicotinamide kinase/transcriptional regulator NadR | Indel |          |
| NCTC86_S3 | NCTC86EC_RS00330 | ribulokinase                                                                                                      | SNP   | nonsyn   |
| NCTC86_S3 | NCTC86EC_RS00530 | cell division protein ZapD                                                                                        | Indel |          |
| NCTC86_S3 | NCTC86EC_RS00540 | guanosine monophosphate reductase                                                                                 | SNP   | nonsyn   |
| NCTC86_S3 | NCTC86EC_RS00670 | hypothetical protein                                                                                              | SNP   | nonsyn   |
| NCTC86_S3 | NCTC86EC_RS01420 | hypothetical protein                                                                                              | SNP   | nonsyn   |
| NCTC86_S3 | NCTC86EC_RS01440 | cytoskeleton protein RodZ                                                                                         | SNP   | nonsyn   |
| NCTC86_S3 | NCTC86EC_RS01450 | histidine-tRNA ligase                                                                                             | SNP   | nonsyn   |
| NCTC86_S3 | NCTC86EC_RS02635 | o-succinylbenzoate synthase                                                                                       | Indel |          |
| NCTC86_S3 | NCTC86EC_RS03800 | hypothetical protein                                                                                              | SNP   | nonsyn   |
| NCTC86_S3 | NCTC86EC_RS03850 | imidazole glycerol phosphate synthase cyclase subunit                                                             | SNP   | nonsyn   |
| NCTC86_S3 | NCTC86EC_RS03880 | ATP phosphoribosyltransferase                                                                                     | SNP   | nonsyn   |
| NCTC86_S3 | NCTC86EC_RS25625 | transposase                                                                                                       | Indel |          |
| NCTC86_S3 | NCTC86EC_RS05315 | PrkA family serine protein kinase                                                                                 | SNP   | nonsyn   |
| NCTC86_S3 | NCTC86EC_RS05385 | MFS transporter                                                                                                   | Indel |          |
| NCTC86_S3 | NCTC86EC_RS05385 | MFS transporter                                                                                                   | SNP   | nonsyn   |
| NCTC86_S3 | NCTC86EC_RS05625 | hypothetical protein                                                                                              | SNP   | nonsyn   |
| NCTC86_S3 | NCTC86EC_RS06185 | Tetr family transcriptional regulator                                                                             | SNP   | nonsyn   |
| NCTC86_S3 | NCTC86EC_RS07575 | peptide transport system ATP-binding protein SapD                                                                 | SNP   | nonsyn   |
| NCTC86_S3 | NCTC86EC_RS09170 | flagellar basal body rod protein FlgG                                                                             | SNP   | nonsyn   |
| NCTC86_S3 | NCTC86EC_RS09770 | transporter                                                                                                       | SNP   | nonsyn   |
| NCTC86_S3 | NCTC86EC_RS10745 | macrolide ABC transporter ATP-binding protein                                                                     | Indel |          |
| NCTC86_S3 | NCTC86EC_RS10750 | hypothetical protein                                                                                              | Indel |          |
| NCTC86_S3 | NCTC86EC_RS10755 | hypothetical protein                                                                                              | Indel |          |
| NCTC86_S3 | NCTC86EC_RS11115 | NAD(P)-dependent oxidoreductase                                                                                   | SNP   | nonsyn   |
| NCTC86_S3 | NCTC86EC_RS11520 | EEP domain-containing protein                                                                                     | SNP   | nonsyn   |
| NCTC86_S3 | NCTC86EC_RS11700 | phospho-2-dehydro-3-deoxyheptonate aldolase Phe-sensitive                                                         | SNP   | nonsyn   |
| NCTC86_S3 | NCTC86EC_RS12600 | IS4 family transposase                                                                                            | Indel |          |
| NCTC86_S3 | NCTC86EC_RS12655 | cation efflux system protein CusF                                                                                 | SNP   | nonsyn   |
| NCTC86_S3 | NCTC86EC_RS13075 | DUF1116 domain-containing protein                                                                                 | SNP   | nonsyn   |
| NCTC86_S3 | NCTC86EC_RS13160 | hypothetical protein                                                                                              | Indel |          |
| NCTC86_S3 | NCTC86EC_RS13845 | D-alanine-D-alanine ligase A                                                                                      | SNP   | nonsyn   |
| NCTC86_S3 | NCTC86EC_RS14790 | CipV1 family T6SS ATPase                                                                                          | SNP   | nonsyn   |
| NCTC86_S3 | NCTC86EC_RS17095 | ABC transporter ATP-binding protein                                                                               | SNP   | nonsyn   |
| NCTC86_S3 | NCTC86EC_RS17690 | transcriptional regulator                                                                                         | SNP   | nonsyn   |
| NCTC86_S3 | NCTC86EC_RS19365 | two-component sensor histidine kinase                                                                             | SNP   | nonsyn   |
| NCTC86_S3 | NCTC86EC_RS20280 | autotransporter beta-domain protein                                                                               | Indel |          |
| NCTC86_S3 | NCTC86EC_RS20525 | hypothetical protein                                                                                              | Indel |          |
| NCTC86_S3 | NCTC86EC_RS20620 | hypothetical protein                                                                                              | SNP   | nonsyn   |
| NCTC86_S3 | NCTC86EC_RS20840 | hypothetical protein                                                                                              | Indel |          |
| NCTC86_S3 | NCTC86EC_RS22210 | universal stress protein D                                                                                        | SNP   | nonsyn   |
| NCTC86_S3 | NCTC86EC_RS22830 | hypothetical protein                                                                                              | SNP   | nonsyn   |
| NCTC86_S3 | NCTC86EC_RS25355 | cell envelope integrity protein CreD                                                                              | SNP   | nonsyn   |
