# Supplementary material for: The Odyssey of the Ancestral Escherich Strain through Culture Collections: an Example of Allopatric Diversification
Source: PubMed Central journal article supplement (PMC5793043; doi:10.1128/msphere.00553-17), 2018-01-31
Supplement: sph001182464st7.pdf [file sph001182464st7.pdf]

TABLE S7. Mutations in *ompR* and *envZ* at the protein level, prediction of their effect and frequencies in Uniprot database

| Genes       | Gene products                           | Mutations at the protein level* | Predictions of functional effect |                           |                      | Frequency |
|-------------|-----------------------------------------|---------------------------------|----------------------------------|---------------------------|----------------------|-----------|
|             |                                         |                                 | SIFT                             | Polyphen                  | PROVEAN              |           |
| <i>ompR</i> | Transcriptional regulatory protein OmpR | M40R                            | 0.10                             | Possibly damaging (0.836) | Deleterious (-5,249) | 0/115     |
|             |                                         | R190C                           | 0.24                             | Possibly damaging (0.922) | Deleterious (-6,483) | 0/115     |
|             |                                         | Y102H                           | 0.00 (low confidence)            | Probably damaging (1.000) | Deleterious (-4,98)  | 0/115     |
| <i>envZ</i> | Osmolarity sensor protein EnvZ          | V227A                           | 0.02                             | Benign (0.279)            | Deleterious (-3,529) | 0/121     |

\*Mutations predicted to be deleterious at the protein level at least with two of the three softwares and absent in Uniprot database are highlighted in red
